# Supplementary material for: Atomic/molecular layer deposition of europium–organic thin films on nanoplasmonic structures towards FRET-based applications
Source: Royal Society of Chemistry journal article supplement (doi:10.1039/d3nr04094a), 2023-01-01
Supplement: d3nr04094a1.pdf [file d3nr04094a1.pdf]

## Supplementary information

### Atomic/molecular layer deposition of europium-organic thin films on nanoplasmonic structures towards FRET-based applications

Amr Ghazy,<sup>a</sup> Jonas Ylönen<sup>b</sup>, Nagarajan Subramaniam<sup>b</sup> and Maarit Karppinen<sup>\*a</sup>

<sup>a</sup>Department of Chemistry and Materials Science, Aalto University, FI-00076 Espoo, Finland

<sup>b</sup>Xfold imaging oy, FI-00076 Espoo, Finland

Email: [maarit.karppinen@aalto.fi](mailto:maarit.karppinen@aalto.fi)

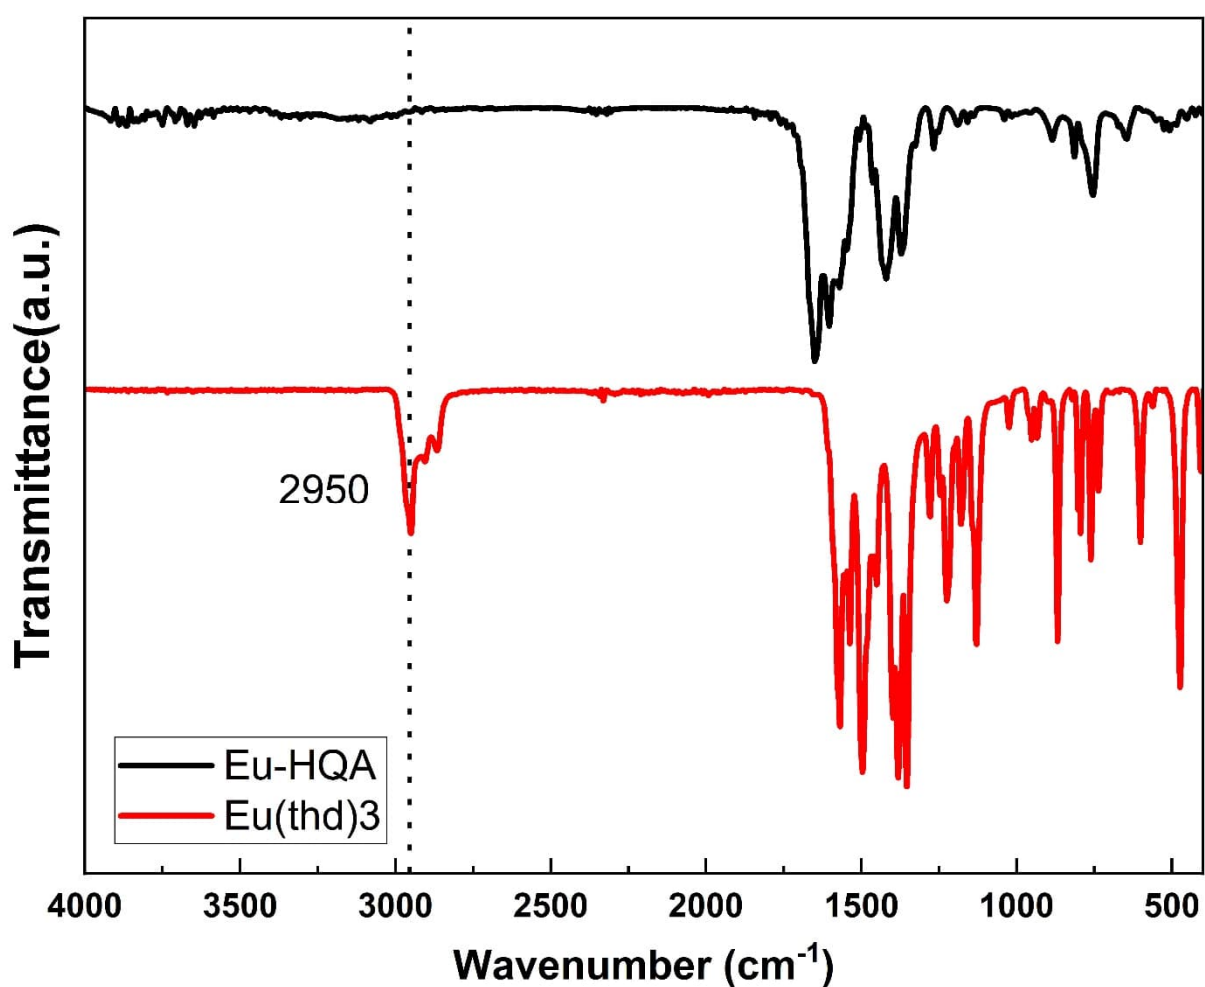

Figure S1 FTIR spectra for Eu(thd) precursor powder and Eu-HQA thin film: comparison of these two spectra clearly shows – upon the Eu-HQA thin film formation – the disappearance of the characteristic  $\beta$ -diketonate ligand peaks in the 2850-2950 cm<sup>-1</sup> range.

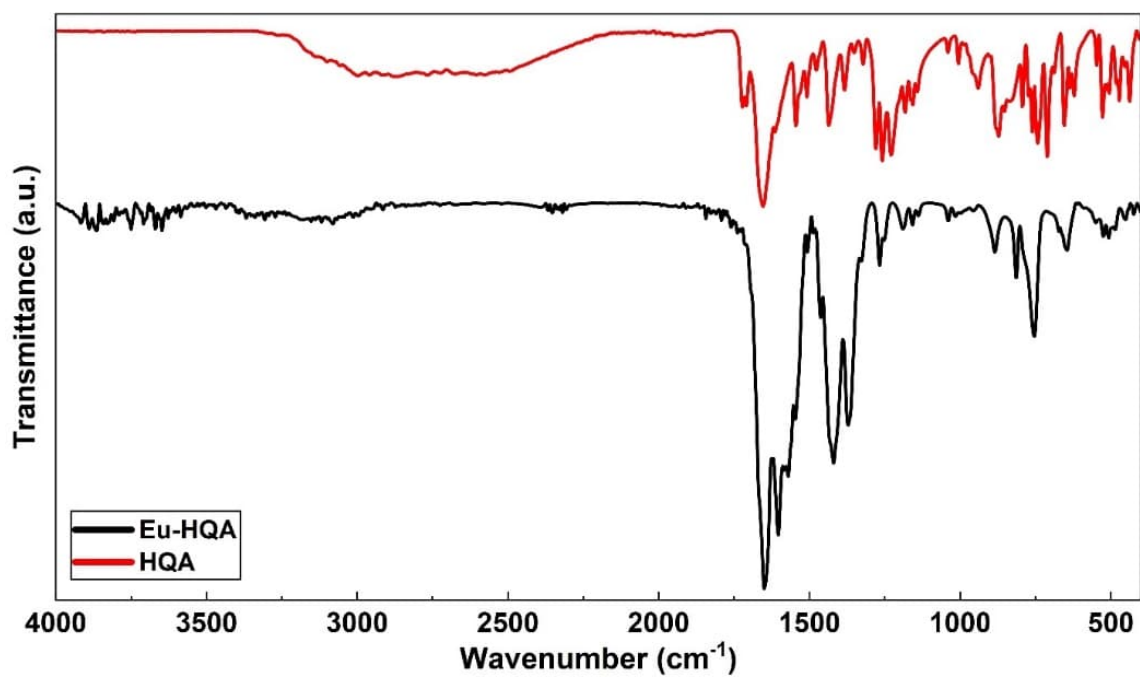

Figure S2 FTIR spectra for HQA precursor powder and Eu-HQA thin film.

Table S1 Detailed interpretations of the FTIR spectral features for HQA and Eu-HQA.

| Wavenumber (cm <sup>-1</sup> ) | Precursor (HQA) | Thin film Eu-HQA | Interpretation            |                                               |
|--------------------------------|-----------------|------------------|---------------------------|-----------------------------------------------|
|                                |                 |                  | Bond                      | Mode                                          |
| 423                            | XXX             | 423              | Eu-O                      |                                               |
| ~450                           | 453             | 447              | Pyridine ring             | In-plane bending                              |
| ~480                           | 480             | 480              | Pyridine ring             | In-plane bending                              |
| ~505                           | 505             | 505              | Phenyl ring               | In-plane bending                              |
| 592                            | XXX             | 592              | Eu-O                      |                                               |
| 651                            | 652             | 647              | pyridine ring             | In-plane bending                              |
| 673                            | XXX             | 673              | Eu-N                      |                                               |
| 709                            | 709             | XXX              | C2=O                      | Out of plane bending                          |
| 745                            | 744             | 752              | Phenyl ring               | Out of plane bending                          |
| 761                            | 761             | 761              | Phenyl ring               | In-plane bending                              |
| 880                            | 875             | 884              | C-H in pyridine ring      | Out of plane bending                          |
| 940                            | 940             | XXX              | NH                        | Out of plane bending                          |
| 955                            | 958             | 955              | C-C in pyridine ring      | Stretching                                    |
| 987                            | 987             | 991              | C-H in phenyl ring        | out of plane bending                          |
| 1039                           | 1040            | 1040             | C-C in phenyl ring        | Stretching                                    |
| 1140                           | 1142            | 1139             | C-H in phenyl ring        | In-plane bending                              |
| 1157                           | 1157            | 11557            | C-H in phenyl ring        | In-plane bending                              |
| 1183                           | 1183            | 1188             | C-H in phenyl ring        | In-plane bending                              |
| 1259                           | 1259            | 1252             | C-C phenyl                | Stretching                                    |
| 1278                           | 1278            | 1270             | C-H in phenyl ring        | In-plane bending                              |
| 1321                           | 1321            | 1326             | C-N                       | Stretching                                    |
| 1349                           | 1349            | XXX              | C=O                       | Bending                                       |
| 1371                           | XXX             | 1371             | C-O-Eu "carboxylate"      | Symmetric stretching                          |
| 1384                           | 1384            | XXX              | C-OH (C2)                 | Symmetric stretching                          |
| 1420                           | XXX             | 1420             | C-O-Eu (C2)               | Symmetric stretching                          |
| 1434                           | 1434            | XXX              | C-H in phenyl ring        | In-plane bending                              |
| 1475                           | 1477            | XXX              | C-N-H                     | Stretching                                    |
| 1505                           | 1507            | 1505             | C-C in Phenyl ring        | Stretching                                    |
| ~1545                          | 1544            | 1547             | C-H in phenyl ring        | In-plane bending                              |
| 1571                           | XXX             | 1571             | C-O-Eu "carboxylate"      | Asymmetric stretching                         |
| 1582                           | XXX             | 1582             | C2-O-Eu                   | Asymmetric stretching                         |
| ~1610                          | 1611            | 1605             | C=C in pyridine ring      | Stretching                                    |
| ~1650                          | 1650            | 1647             | C=C in phenyl ring        | Stretching                                    |
| 1710                           | 1710            | XXX              | Free carboxylic group C-O | Asymmetric stretching                         |
| 1723                           | 1723            | XXX              | C2-OH stretch             | Asymmetric stretching                         |
| 12500-2900                     | 2500-2900       | XXX              | OH and NH                 | Stretching (wide peaks)                       |
| 3000-3250                      | 3000-3250       | 3000-3250        | CH                        | Asymmetric stretch of both rings (wide peaks) |
